# Supplementary material
Source: MDPI journal article supplement (https://www.mdpi.com/2073-4344/12/4/386)
Supplement: s1 [file s1]

## Supplementary Materials

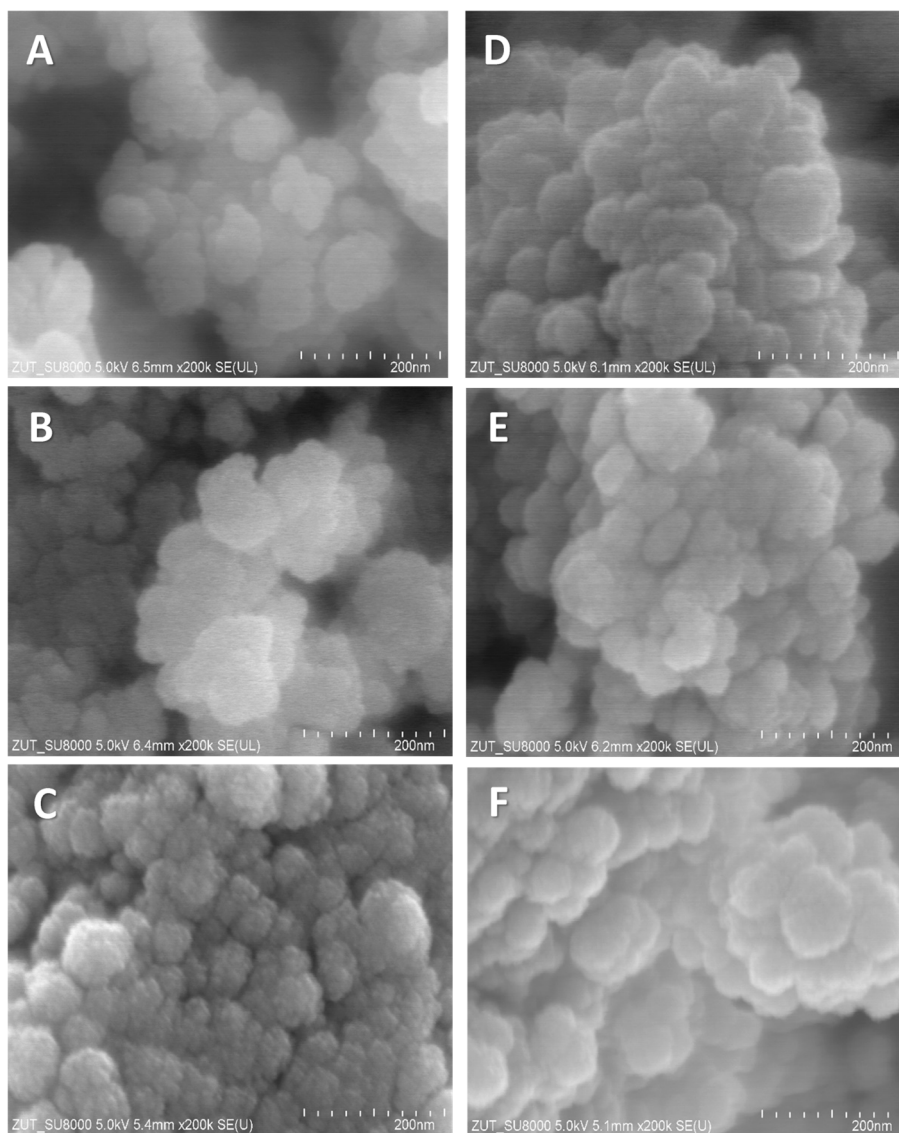

Figure S1. SEM images of TiO<sub>2</sub> prepared in Ar at: A) 400 °C, B) 500 °C, C) 600 °C and at H<sub>2</sub>: D) 450 °C, E) 500 °C, F) 600 °C, magnification x 200 k.
